# Supplementary material for: Functionalized Hydroperoxide Formation from the Reaction of Methacrolein-Oxide, an Isoprene-Derived Criegee Intermediate, with Formic Acid: Experiment and Theory
Source: MDPI journal article supplement (doi:10.3390/molecules26103058), 2021-05-20
Supplement: s1 [file s1]

## Supplementary Materials

Functionalized hydroperoxide formation from the reaction of methacrolein-oxide, an isoprene-derived Criegee intermediate, with formic acid: Experiment and theory

Michael F. Vansco<sup>1,2</sup>, Kristen Zuraski<sup>3</sup>, Frank A. F. Winiberg<sup>4,5</sup>, Kendrew Au<sup>6</sup>, Nisalak Trongsiwat<sup>1</sup>, Patrick J. Walsh<sup>1</sup>, David L. Osborn<sup>6,7</sup>, Carl J. Percival<sup>4</sup>, Stephen J. Klippenstein<sup>2</sup>, Craig A. Taatjes<sup>6\*</sup>, Marsha I. Lester<sup>1\*</sup>, and Rebecca L. Caravan<sup>2,3,\*</sup>

<sup>1</sup>Department of Chemistry, University of Pennsylvania, Philadelphia, PA 19104-6323, USA.

<sup>2</sup>Chemical Sciences and Engineering Division, Argonne National Laboratory, Lemont, IL 60439, USA.

<sup>3</sup>NASA Postdoctoral Program Fellow, NASA Jet Propulsion Laboratory, California Institute of Technology, 4800 Oak Grove Drive, Pasadena, CA 91109, USA.

<sup>4</sup>NASA Jet Propulsion Laboratory, California Institute of Technology, 4800 Oak Grove Drive, Pasadena, CA 91109, USA.

<sup>5</sup>Division of Chemistry and Chemical Engineering, California Institute of Technology, Pasadena, CA 91125, USA.

<sup>6</sup>Combustion Research Facility, Mailstop 9055, Sandia National Laboratories, Livermore, CA 94551, USA.

<sup>7</sup>Department of Chemical Engineering, University of California, Davis, CA 95616, USA

Correspondence: cataatj@sandia.gov (C.A.T), milester@sas.upenn.edu (M.I.L.), and caravarl@anl.gov (R.L.C.)

## Table of Contents:

|                                                                                                           |     |
|-----------------------------------------------------------------------------------------------------------|-----|
| Section S1. HCO <sub>2</sub> -loss fragment ion.....                                                      | S3  |
| Section S2. Theoretical reaction pathways.....                                                            | S6  |
| Section S3. Stationary point geometries.....                                                              | S14 |
| Table S1. Stationary point energies and corrections.....                                                  | S8  |
| Figure S1 Temporal profile of m/z 87 as a function of formic acid concentration.....                      | S3  |
| Figure S2: Comparison of m/z 87 and 99 integrated signals as a function of formic acid concentration...   | S4  |
| Figure S3: Photoionization spectrum of m/z 87 with and without formic acid added.....                     | S5  |
| Figure S4. Reaction coordinate for the 1,4-addition of <i>syn-cis</i> -MACR-oxide with formic acid.....   | S11 |
| Figure S5. Reaction coordinate for the 1,4-addition of <i>syn-trans</i> -MACR-oxide with formic acid..... | S12 |
| Figure S6. Reaction coordinate for the spectator catalysis of <i>syn-cis</i> -MACR-oxide to dioxole.....  | S13 |

## Section S1. HCO<sub>2</sub>-loss fragment ion

Functionalized hydroperoxides formed from the reaction of Criegee intermediates with formic acid have been shown to undergo dissociative ionization to HO<sub>2</sub>-loss and HCO<sub>2</sub>-loss fragment ions [1]. Scheme 2 (main text) shows the fragment ions that are predicted to be generated from dissociative ionization of 1-hydroperoxy-2-methylallyl formate (HPMAF), the functionalized hydroperoxide predicted to be formed from the reaction of MACR-oxide with formic acid. The chemical composition of the fragment ions, C<sub>5</sub>H<sub>7</sub>O<sub>2</sub> (99.045) and C<sub>4</sub>H<sub>7</sub>O<sub>2</sub> (87.045), are consistent with the exact masses of the product features observed in the experiment ( $99.045 \pm 0.002$  and  $87.043 \pm 0.003$ , respectively). The time profile of m/z 99 (Figure S1) obtained using 10.5 eV VUV photon energy shows a weak signal is present at m/z 87 in the absence of formic acid (light grey line).

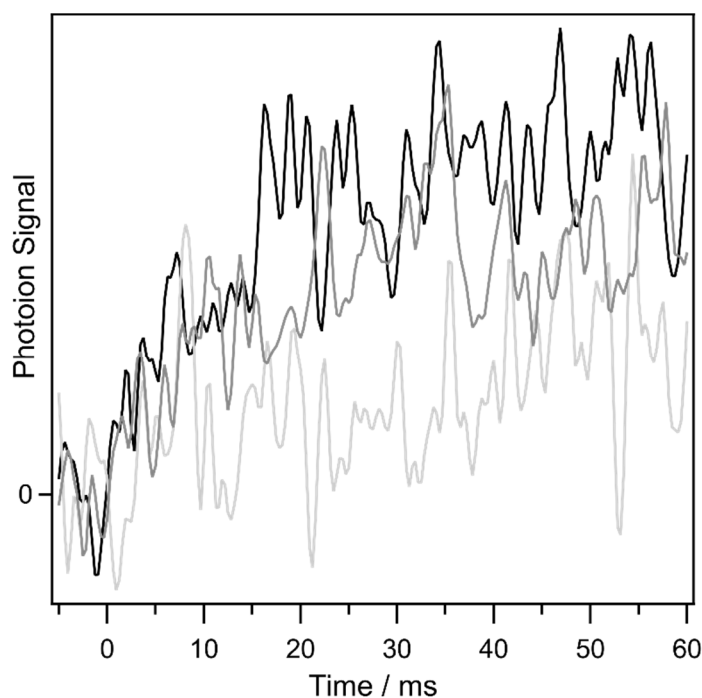

**Figure S1.** Temporal profile of m/z 87 observed from the reaction of MACR-oxide with formic acid (light grey line [formic acid] =  $0 \text{ cm}^{-3}$ , dark grey line [formic acid] =  $6.6 \times 10^{12} \text{ cm}^{-3}$ , black line [formic acid] =  $5.7 \times 10^{13} \text{ cm}^{-3}$ ) at a photoionization energy of 10.5 eV. A three-point smooth is applied to the data to guide the eye. A weak signal is present at m/z 87 in the absence of formic acid. The amplitude of the m/z 87 signal increases in the presence of formic acid and reveals the rapid formation of a stable product

The signal at m/z 87 increases in amplitude with the addition of formic acid and exhibits a similar time profile to that of m/z 99 providing evidence that the formic acid dependent signals originate from the same source. Figure S2 shows the integrated signal of m/z 99 (left axis) and 87 (right axis) at a VUV photon energy of 10.5 eV as a function of formic acid concentration.

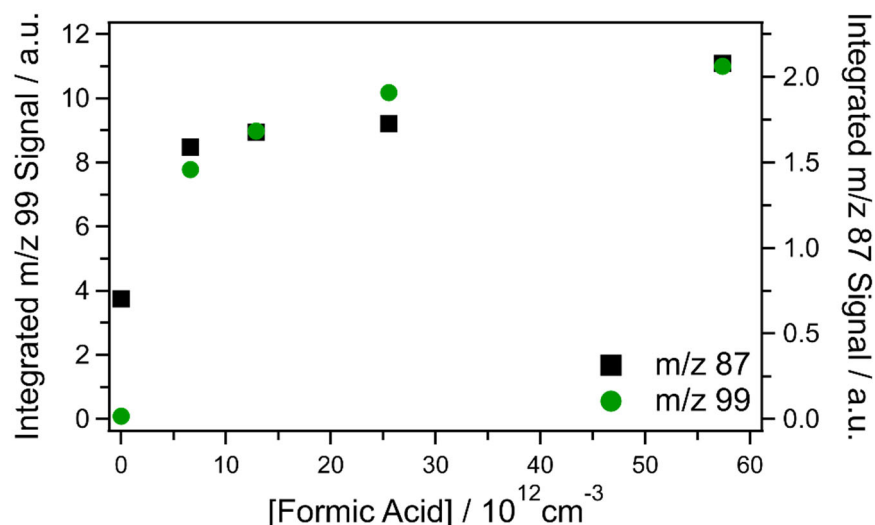

**Figure S2.** Integrated signal of m/z 99 (left, green circles) and m/z 87 (right, black squares) obtained using a photon energy of 10.5 eV as a function of formic acid concentration.

The signals at m/z 99 and 87 show a similar increase with increasing formic acid concentration, indicating the formic acid dependent signal originates from the same source. Assuming the reaction of MACR-oxide with formic acid has a similar rate coefficient as the reaction of MVK-oxide with formic acid ( $3 \times 10^{-10} \text{ cm}^3 \text{ s}^{-1}$ ), a slow predicted unimolecular decay rate ( $\sim 10 \text{ s}^{-1}$ ) [2] and a wall loss of  $\sim 400 \text{ s}^{-1}$ , the majority of the initial thermalized MACR-oxide population ( $\sim 80\%$ ) should react with formic acid even at the lowest formic acid concentration used in the experiment ( $6.6 \times 10^{12} \text{ cm}^{-3}$ ). This prediction is consistent with the small increase in amplitude of the fragment ion signals at formic acid concentrations  $> 6.6 \times 10^{12} \text{ cm}^{-3}$  providing evidence that the formic acid dependent signal on m/z 87 originates from reaction of MACR-oxide with formic acid.

Detection of the  $\text{HCO}_2$ -loss fragment ion from photoionization of HPMF is further evidenced by comparing the photoionization spectrum of m/z 87 to calculations of its appearance energy at the

CCSD(T)-F12/cc-pVTZ-F12//B2PLYP-D3/cc-pVTZ level of theory. Figure S3 shows the photoionization spectrum of  $m/z$  87 in the presence (9.0-11.0 eV, 50 meV steps, open circles) and absence (9.0-10.7 eV, 50 meV steps, red line) of formic acid integrated over the full kinetic time window (0-60 ms).

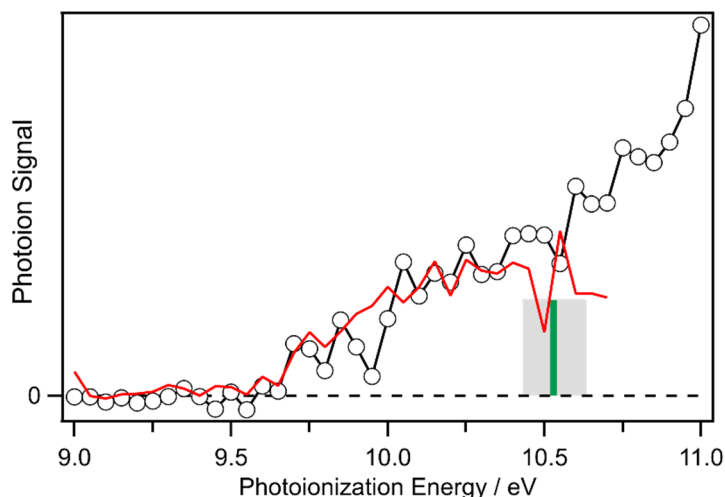

**Figure S3.** Photoionization spectrum of  $m/z$  87 obtained in the presence (open circles,  $[\text{formic acid}] = 2.6 \times 10^{13} \text{ cm}^{-3}$ ) and absence (red line,  $[\text{formic acid}] = 0 \text{ cm}^{-3}$ ) of formic acid and integrated over the full kinetic time window (0-60 ms). Comparison to the photoionization spectrum obtained in the absence of formic acid reveals two components contribute to the  $m/z$  87 photoionization signal. The calculated appearance energy of the  $\text{HPMAF-HCO}_2$  fragment ion (green solid line, 10.53 eV) agrees well with the higher energy component. The grey shaded region represents uncertainty associated with the calculated ionization energies ( $\pm 0.1 \text{ eV}$ ).

The photoionization spectrum of  $m/z$  87 obtained in the presence of formic acid reveals low and high energy components. The low energy component is consistent with the photoionization spectrum of  $m/z$  87 in the absence of formic acid (red trace). The persistence of the lower energy component after addition of formic acid, an effective Criegee intermediate scavenger, indicates its origin is likely not from reactions involving MACR-oxide. The higher energy component is consistent with calculations of the appearance energy of the  $\text{HCO}_2$ -loss fragment ion (10.53 eV), confirming the formic acid dependent signal originates from its reaction with MACR-oxide. The relatively small signal on  $m/z$  87 signal compared to  $m/z$  99 obtained at 10.5 eV as a function of formic acid concentration is consistent with the VUV photon energy being near the threshold for dissociative ionization of HPMAF to  $\text{HCO}_2$  and fragment ion co-product.

## Section S2: Theoretical reaction pathways

### Overview

The reaction of MACR-oxide with formic acid is investigated with electronic structure calculations for all four conformational forms of MACR-oxide. The results for HPMAF formation from the reaction of *anti-trans*-MACR-oxide, the most stable conformer of MACR-oxide, with formic acid is shown in the main text. Here, we present results for the reaction of *anti-cis*-MACR-oxide, *syn-cis*-MACR-oxide, and *syn-trans*-MACR-oxide with formic acid. In addition, we present the results regarding the spectator catalysis of *syn-cis*-MACR-oxide by formic acid to dioxole.

### Stationary Point Energies

The stationary point energies for the various reaction channels in the reaction of all four conformers of MACR-oxide with formic acid were determined at the CCSD(T)-F12/cc-pVTZ-F12//B2PLYP-D3/cc-pVTZ level of theory with an estimated CCSDT(Q) correction based on previous calculations for the isomerization of MVK-oxide and reaction of CH<sub>2</sub>OO with SO<sub>2</sub> [1, 3], to account for multireference effects present for Criegee intermediates. These effects arise from resonances between zwitterionic and singlet diradical electronic configurations of Criegee intermediates. Calculations at the CCSDT(Q) level largely capture these multireference effects, but such calculations are impractical for the many heavy atom system being investigated. Specifically, the MACR-oxide pre-reactive complexes (PRCs), transition states for chemical conversions from the PRCs, and products are estimated to be raised by 0.4, 0.8, and 1.5 kcal mol<sup>-1</sup> relative to the reactants, respectively. We estimate the uncertainties in these corrections to be ~0.2 kcal mol<sup>-1</sup> for the PRCs and transition states, and ~0.4 kcal mol<sup>-1</sup> for the products. Zero-point energy (ZPE) corrections are evaluated at the B2PLYP-D3/cc-pVTZ level. Overall, we expect 2σ uncertainties in our predicted energies of ~0.6 kcal mol<sup>-1</sup>. The resultant energies are reported in Table S1.

The reaction pathway for HPMAF formation from the reaction of *anti-trans*-MACR-oxide, the lowest energy conformer, is illustrated in the main text (Figure 6). The analogous reaction pathways for

HPMAF formation from the reactions of *syn-trans*-MACR-oxide and *syn-cis*-MACR-oxide are illustrated in Figure S4 and S5. The reaction is predicted to proceed via a similar 1,4-addition mechanism via a highly submerged transition state barrier to form HPMAF. Interestingly, the reaction of *anti-cis*-MACR-oxide with formic acid is barrierless at the B2PLYP-D3/cc-pVTZ level of theory. At the  $\omega$ B97XD/6-31+G\* level of theory, a stationary point for the pre-reactive complex and first-order saddle point for the transition state to HPMAF formation is found. However, the zero-point energy of the pre-reactive complex is larger than that of the transition state such that the reaction is effectively barrierless at the  $\omega$ B97XD/6-31+G\* level of theory as well.

**Table S1.** Stationary point energies (kcal mol<sup>-1</sup>) for the reaction of *syn/anti-cis/trans* (*s/a-c/t*) MACR-oxide with formic acid (FA).<sup>a</sup> Energies include ZPE corrections and are reported relative to *a-t*-MACR-oxide.

| Stationary Point                                                                          | $\omega$ B97XD<br>6-31+G* | B2PLYP-D3<br>cc-pVTZ | CCSD(T)-F12<br>cc-pVTZ-F12 | E0 <sup>b</sup> | Total <sup>c</sup> | Corr.<br>Total <sup>d</sup> |
|-------------------------------------------------------------------------------------------|---------------------------|----------------------|----------------------------|-----------------|--------------------|-----------------------------|
| <i>Reactants</i>                                                                          |                           |                      |                            |                 |                    |                             |
| <i>a-t</i> -MACR-oxide + FA                                                               | 0                         | 0                    | 0                          | 0               | 0                  | 0                           |
| <i>s-c</i> -MACR-oxide + FA                                                               | -0.3                      | 0.5                  | 0.7                        | 0.2             | 0.9                | 0.9                         |
| <i>s-t</i> -MACR-oxide + FA                                                               | 1.7                       | 2.2                  | 2.3                        | 0.2             | 2.5                | 2.5                         |
| <i>a-c</i> -MACR-oxide + FA                                                               | 2.7                       | 3.7                  | 3.4                        | -0.2            | 3.2                | 3.2                         |
| <i>van der Waals</i>                                                                      |                           |                      |                            |                 |                    |                             |
| Reactant Wells                                                                            |                           |                      |                            |                 |                    |                             |
| <i>a-t</i> -MACR-oxide...FA                                                               | -20.8                     | -19.2                | -17.2                      | 0.9             | -16.3              | -15.9                       |
| <i>s-c</i> -MACR-oxide...FA                                                               | -18.7                     | -15.9                | -13.6                      | 1.3             | -12.3              | -11.9                       |
| <i>s-t</i> -MACR-oxide...FA                                                               | -17.9                     | -15.8                | -13.8                      | 1.3             | -12.5              | -12.1                       |
| <i>a-c</i> -MACR-oxide...FA                                                               | -19.0                     | N/A                  | N/A                        | N/A             | N/A                | N/A                         |
| Product Wells                                                                             |                           |                      |                            |                 |                    |                             |
| Dioxole...FA                                                                              | -45.4                     | -38.7                | -39.4                      | 2.6             | -36.8              | -35.3                       |
| <i>Transition States</i>                                                                  |                           |                      |                            |                 |                    |                             |
| <i>cis/trans</i>                                                                          |                           |                      |                            |                 |                    |                             |
| <i>a-t</i> -MACR-oxide =<br><i>a-c</i> -MACR-oxide                                        | 9.4                       | 10.2                 | 9.3                        | -0.5            | 8.8                | 9.2                         |
| <i>s-t</i> -MACR-oxide =<br><i>s-c</i> -MACR-oxide                                        | 9.4                       | 9.6                  | 8.9                        | -0.3            | 8.6                | 9.0                         |
| 1,4 Addition (TS <sub>a</sub> )                                                           |                           |                      |                            |                 |                    |                             |
| <i>a-t</i> -MACR-oxide...FA =<br><i>a-t</i> -HPMAF                                        | -20.4                     | -19.1                | -16.6                      | 0.0             | -16.6              | -15.8                       |
| <i>s-c</i> -MACR-oxide...FA =<br><i>s-c</i> -HPMAF                                        | -17.3                     | -15.0                | -11.9                      | 0.0             | -11.9              | -11.1                       |
| <i>s-t</i> -MACR-oxide...FA =<br><i>s-t</i> -HPMAF                                        | -17.0                     | -15.0                | -12.3                      | 0.1             | -12.2              | -11.4                       |
| <i>a-c</i> -MACR-oxide...FA =<br><i>a-c</i> -HPMAF                                        | -19.0                     | N/A                  | N/A                        | N/A             | N/A                | N/A                         |
| Dioxole Formation; w and w/o Spectator Catalysis (TS <sub>d</sub> , TS <sub>d,cat</sub> ) |                           |                      |                            |                 |                    |                             |
| <i>a-c</i> -MACR-oxide =<br>Dioxole                                                       | 12.4                      | 12.5                 | 13.6                       | -0.1            | 13.5               | 14.3                        |
| <i>a-c</i> -MACR-oxide...FA =<br>Dioxole...FA                                             | -3.4                      | -2.0                 | 1.4                        | 1.0             | 2.4                | 3.2                         |
| <i>Products</i>                                                                           |                           |                      |                            |                 |                    |                             |
| <i>a-t</i> -HPMAF                                                                         | -43.5                     | -37.1                | -38.5                      | 3.2             | -35.3              | -33.8                       |
| <i>a-t</i> -HPMAF; Geometry 2                                                             | -41.9                     | -36.3                | -38.0                      | 2.7             | -35.3              | -33.8                       |
| <i>s-c</i> -HPMAF                                                                         | -41.2                     | -34.1                | -35.1                      | 3.3             | -31.8              | -30.3                       |
| <i>s-c</i> -HPMAF; Geometry 2                                                             | -39.4                     | -32.7                | -33.8                      | 3.2             | -30.6              | -29.1                       |
| <i>s-t</i> -HPMAF                                                                         | -42.6                     | -35.9                | -37.2                      | 3.4             | -33.8              | -32.3                       |
| <i>s-t</i> -HPMAF; Geometry 2                                                             | -39.7                     | -34.0                | -35.5                      | 2.7             | -32.8              | -31.3                       |
| <i>a-c</i> -HPMAF                                                                         | -43.5                     | -37.0                | -38.4                      | 3.2             | -35.2              | -33.7                       |
| <i>a-c</i> -HPMAF; Geometry 2                                                             | -40.9                     | -35.1                | -36.9                      | 2.7             | -34.2              | -32.7                       |
| Dioxole + FA                                                                              | -33.4                     | -28.5                | -29.7                      | 1.2             | -28.5              | -27.0                       |

<sup>a</sup> All energies are relative to *anti-trans*-MACR-oxide + FA. The first three columns are electronic energies, the next is the zero-point vibrational energy. The last two columns are the sum of the CCSD(T)-



F12/cc-pVTZ-F12 electronic energy and B2PLYP-D3/cc-pVTZ zero-point without (Total) and with (Corr. Total) the adhoc correction for multireference effects.

<sup>b</sup> Zero-point energies from harmonic B2PLYP-D3/cc-pVTZ calculations.

<sup>c</sup> Total corresponds to the sum of the CCSD(T)-F12 energy and E0.

<sup>d</sup> The total energy corrected by estimated CCSDT(Q) higher level corrections.

### *Catalytic reaction pathways*

Recently, this group reported direct evidence for the formic acid catalyzed isomerization of *syn*-MVK-oxide to a vinyl hydroperoxide species using MPIMS [4]. Performing the reaction with deuterated formic acid enabled a migration of a D atom to yield a partially deuterated vinyl hydroperoxide product, which was identified by its distinct mass and photoionization threshold. An analogous mechanism is not feasible for the reaction of MACR-oxide with formic acid because MACR-oxide lacks an  $\alpha$ -H-atom in a methyl (or alkyl) group adjacent to the terminal O-atom. Specific conformational forms of MACR-oxide (*syn*) are predicted to undergo unimolecular decay via a rapid electrocyclic ring closure mechanism to form a dioxole species. Here, we consider the formic acid catalyzed formation of the dioxole species via a spectator catalysis mechanism (Figure S6). However, similar to the analogous reaction pathway for MVK-oxide, we find that the transition state barrier ( $3.17 \text{ kcal mol}^{-1}$ ) is too high to compete with the substantially more favorable 1,4-addition pathway.

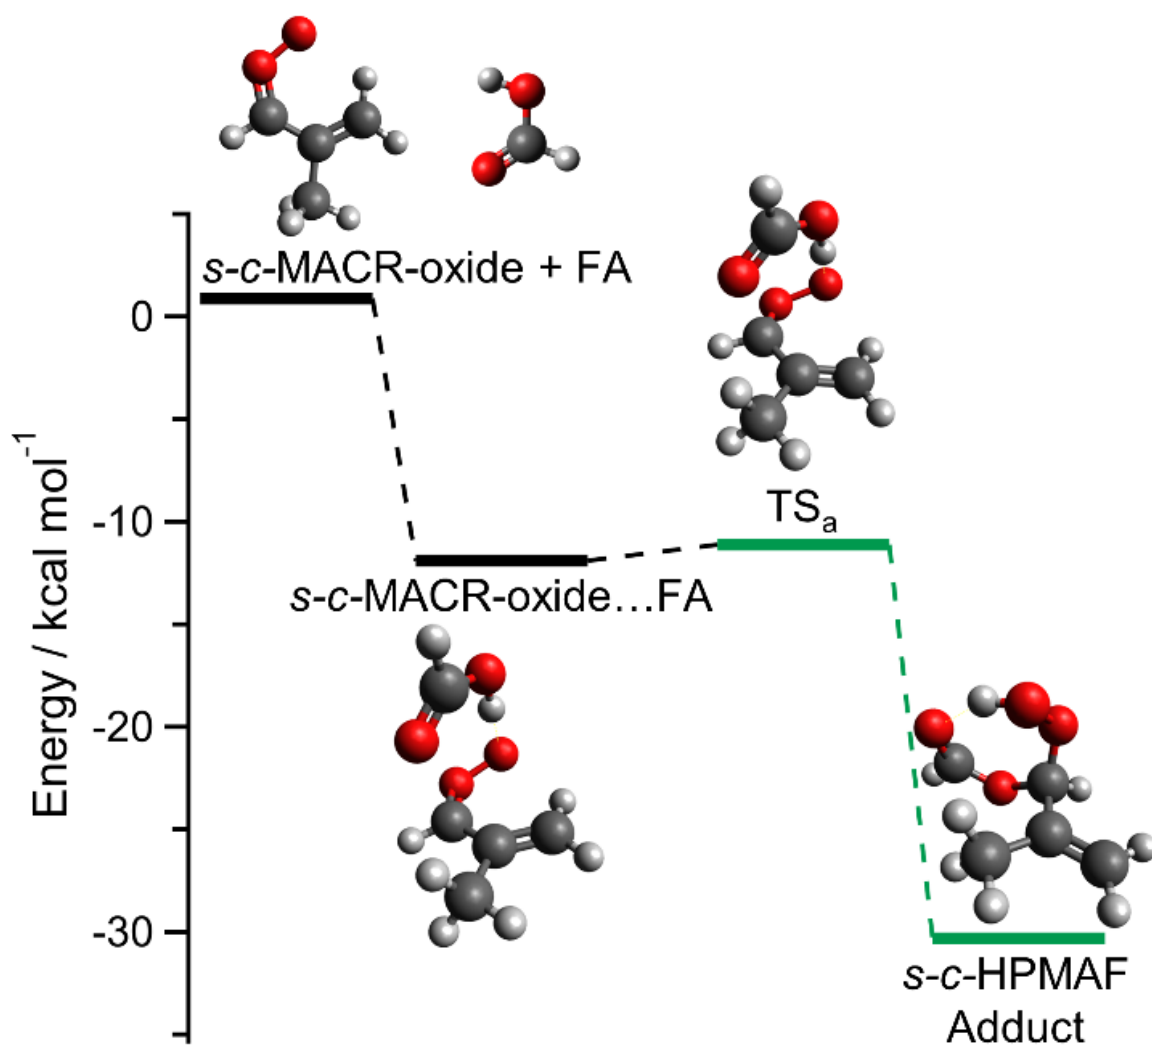

**Figure S4.** Reaction coordinate showing product formation from the 1,4-addition reaction of *syn-cis*-MACR-oxide with formic acid at the CCSD(T)-F12/cc-pVTX-F12//B2PLYP-D3/cc-pVTZ level of theory including estimated CCSDT(Q) corrections.

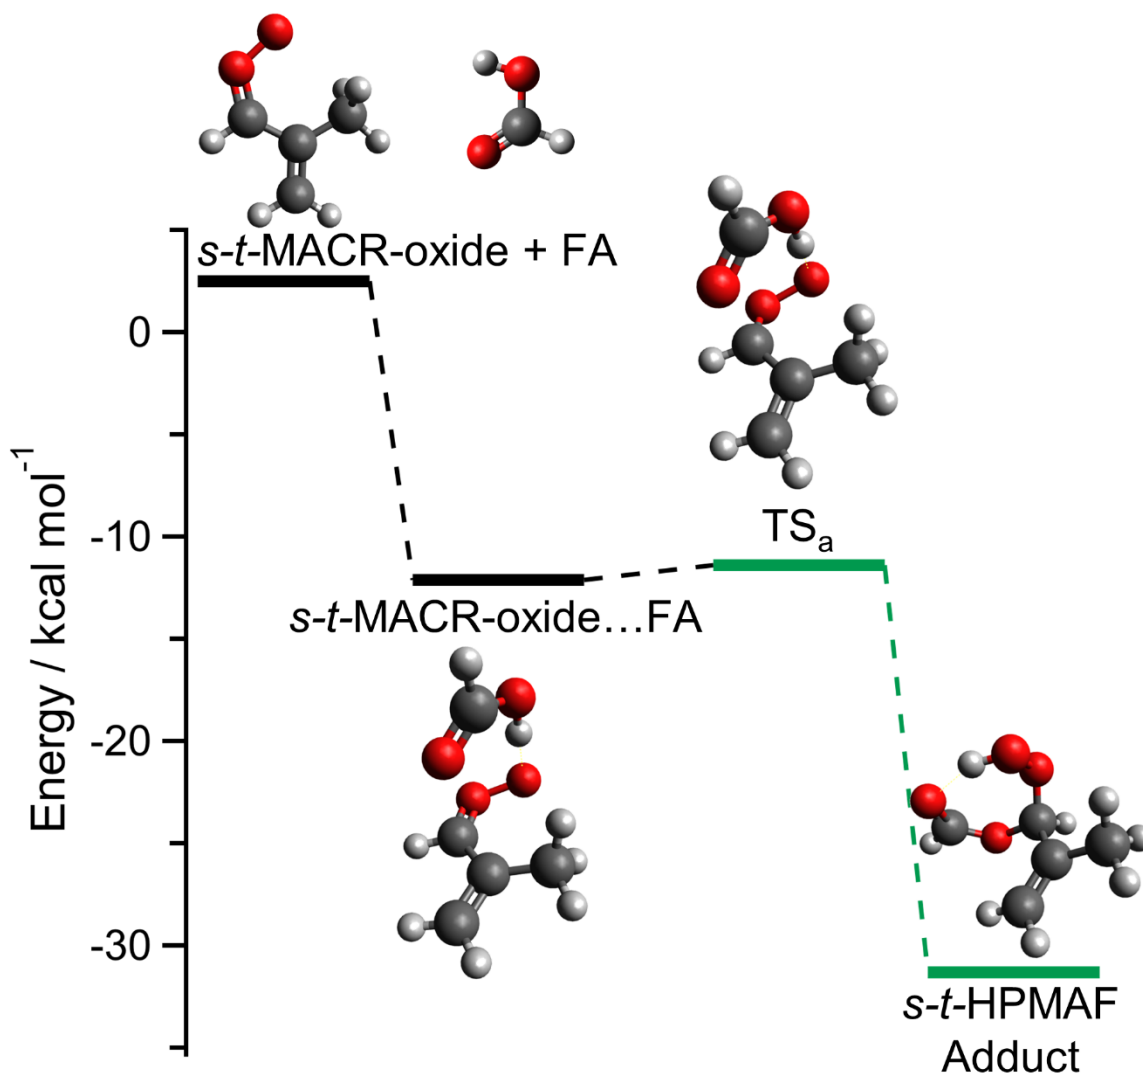

**Figure S5.** Reaction coordinate showing product formation from the 1,4-addition reaction of *syn-trans*-MACR-oxide with formic acid at the CCSD(T)-F12/cc-pVTX-F12//B2PLYP-D3/cc-pVTZ level of theory including estimated CCSDT(Q) corrections.

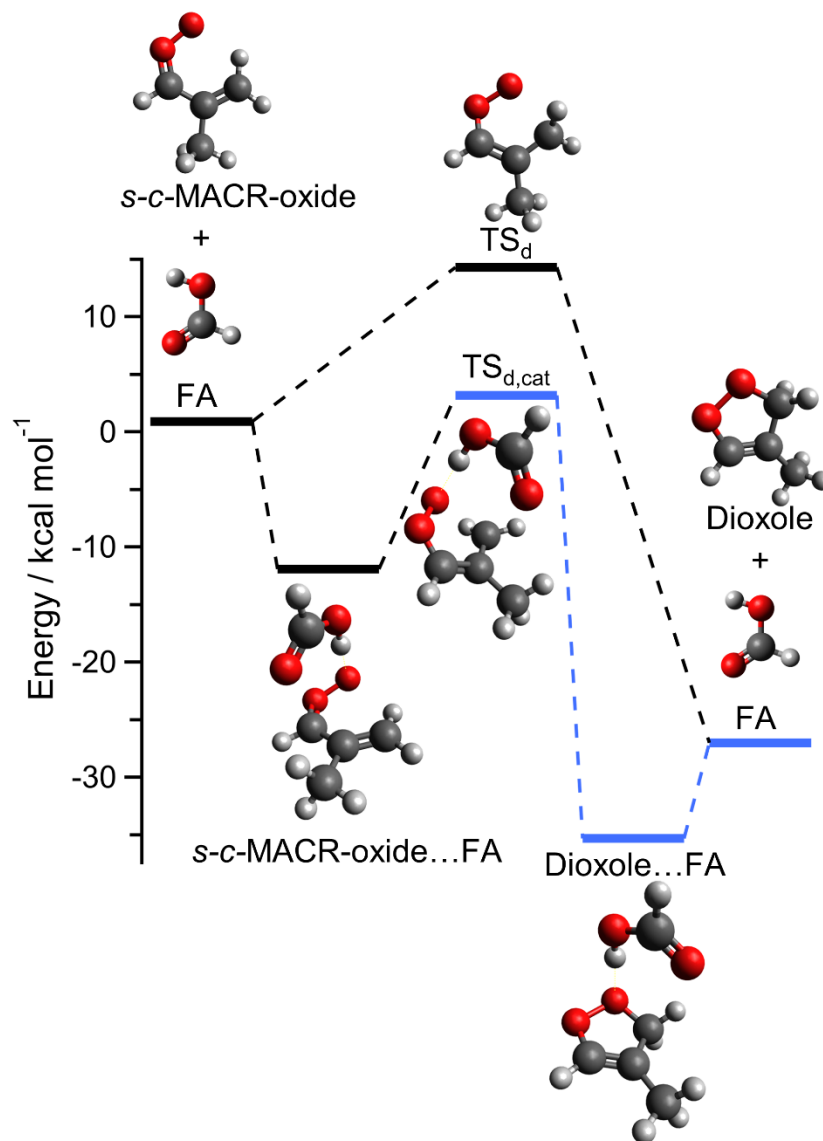

**Figure S6.** Reaction coordinate showing the spectator catalysis *syn-cis*-MACR-oxide with formic acid to dioxole at the CCSD(T)-F12/cc-pVTX-F12//B2PLYP-D3/cc-pVTZ level of theory including estimated CCSDT(Q) corrections.

Section S3. Stationary point geometries

**Structure and Frequencies at the B2PLYP-D3/cc-pVTZ level**

*Reactants*

**Formic Acid**

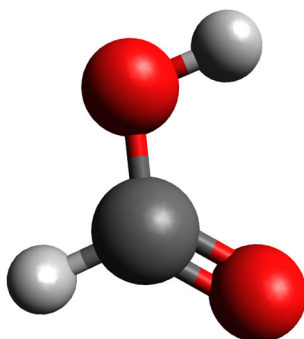

Coordinates

```
8 -1.0306350000 -0.4423620000 0.0000000000
6 0.0000000000 0.4212380000 0.0000000000
1 -0.6519010000 -1.3342230000 0.0000000000
1 -0.3801630000 1.4461820000 0.0000000000
8 1.1596430000 0.1124390000 0.0000000000
```

Frequencies

```
629.737
685.904
1061.85
1130.39
1313.81
1413.54
1812.84
3088.84
3745.69
```

## MACR-oxide

*anti-trans*-MACR-oxide

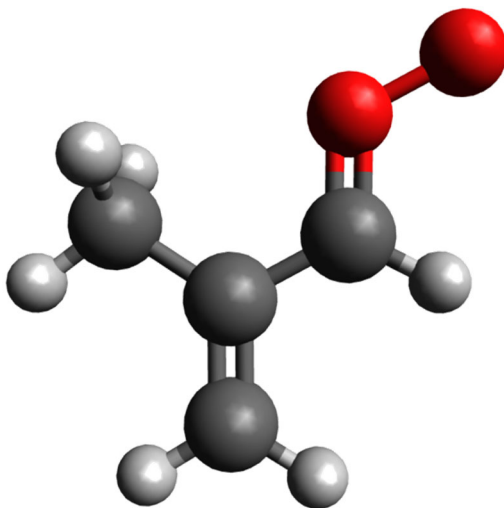

### Coordinates

```
6 2.2150130000 -0.1997910000 0.0000000000
1 2.5967870000 0.8111370000 0.0000000000
1 2.9340580000 -1.0048510000 0.0000000000
6 0.8920210000 -0.4472490000 0.0000000000
6 0.3100810000 -1.8307340000 0.0000000000
1 1.1009980000 -2.5754780000 0.0000000000
1 -0.3196150000 -1.9850150000 0.8751040000
1 -0.3196150000 -1.9850150000 -0.8751040000
6 0.0000000000 0.6736280000 0.0000000000
1 0.3190290000 1.7086680000 0.0000000000
8 -1.2626950000 0.4625590000 0.0000000000
8 -2.0890970000 1.5193700000 0.0000000000
```

### Frequencies

|         |         |         |
|---------|---------|---------|
| 152.383 | 918.175 | 1473.1  |
| 186.444 | 940.667 | 1492.79 |
| 188.285 | 1004.01 | 1512.67 |
| 230.51  | 1045.05 | 1655.03 |
| 370.822 | 1060.09 | 3064.25 |
| 479.909 | 1079.86 | 3124.54 |
| 507.426 | 1289.9  | 3154.09 |
| 575.991 | 1370.75 | 3167.56 |
| 698.285 | 1422.04 | 3189.08 |
| 873.755 | 1442.39 | 3260.36 |

*syn-cis*-MACR-oxide

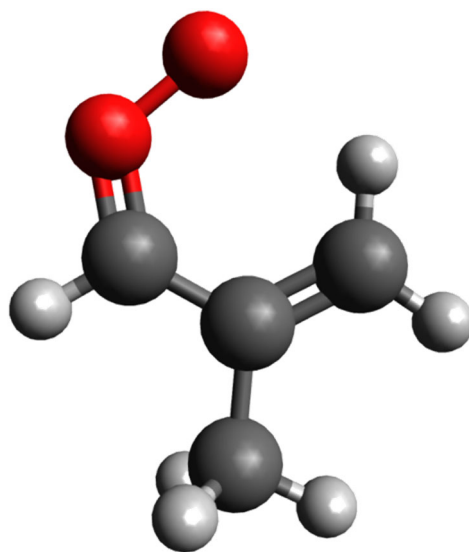

Coordinates

```
6 -1.3504190000 0.7604020000 0.0000000000
1 -1.8731280000 -0.1777490000 0.0000000000
1 -1.9056560000 1.6888050000 0.0000000000
6 0.0000000000 0.8039380000 0.0000000000
6 0.7571030000 2.1103670000 0.0000000000
1 0.0667310000 2.9493130000 0.0000000000
1 1.3958310000 2.1966750000 0.8790410000
1 1.3958310000 2.1966750000 -0.8790410000
6 0.8326520000 -0.3582720000 0.0000000000
1 1.9102190000 -0.2662740000 0.0000000000
8 0.4946500000 -1.6012620000 0.0000000000
8 -0.7978800000 -1.9594950000 0.0000000000
```

Frequencies

|         |         |         |
|---------|---------|---------|
| 108.352 | 913.049 | 1497.38 |
| 130.543 | 980.079 | 1499.39 |
| 284.771 | 980.423 | 1517.28 |
| 318.322 | 1021.5  | 1629.14 |
| 341.31  | 1050.55 | 3054    |
| 422.588 | 1081.75 | 3111.26 |
| 541.984 | 1273.01 | 3148.08 |
| 709.971 | 1350.37 | 3166.33 |
| 713.074 | 1419.92 | 3204.03 |
| 861.824 | 1438.91 | 3309.97 |



*syn-trans*-MACR-oxide

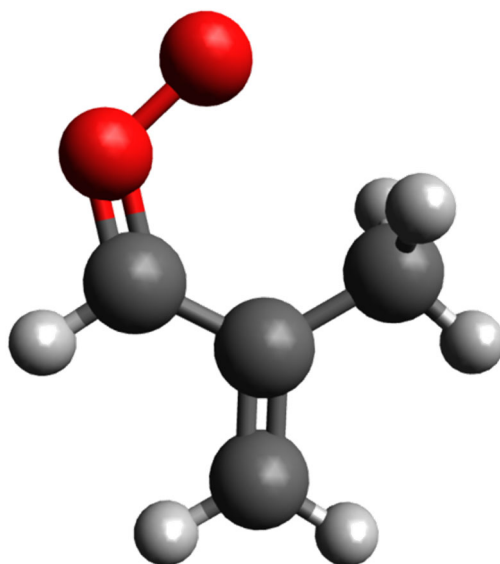

Coordinates

```
6 -0.5386130000 2.1092540000 0.0000000000
1 -1.6085700000 2.2614290000 0.0000000000
1 0.0873600000 2.9888280000 0.0000000000
6 0.0000000000 0.8728020000 0.0000000000
6 1.4856490000 0.6509730000 0.0000000000
1 1.9953750000 1.6125110000 0.0000000000
1 1.7901250000 0.0737220000 0.8682100000
1 1.7901250000 0.0737220000 -0.8682100000
6 -0.9541260000 -0.2055700000 0.0000000000
1 -2.0138190000 0.0104510000 0.0000000000
8 -0.7475410000 -1.4701750000 0.0000000000
8 0.4977840000 -1.9780020000 0.0000000000
```

Frequencies

|         |         |         |
|---------|---------|---------|
| 66.2324 | 858.513 | 1480.49 |
| 213.422 | 943.713 | 1481.13 |
| 257.608 | 956.966 | 1513.44 |
| 330.933 | 1003.97 | 1642.13 |
| 350.161 | 1068.72 | 3071.43 |
| 426.129 | 1082.39 | 3152.58 |
| 556.49  | 1339.05 | 3154.8  |
| 700.598 | 1358.16 | 3165.62 |
| 729.186 | 1425.36 | 3203.68 |
| 852.994 | 1446.01 | 3257.91 |

*anti-cis*-MACR-oxide

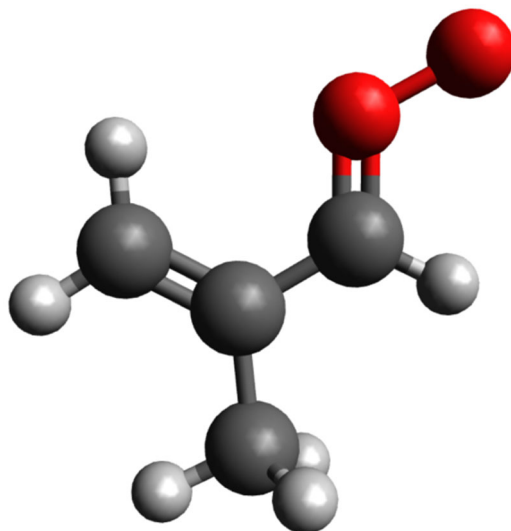

Coordinates

```
6 -0.0326390000 -1.8490550000 0.0000000000
1 1.0458720000 -1.8928800000 0.0000000000
1 -0.5758180000 -2.7817180000 0.0000000000
6 -0.6881080000 -0.6767650000 0.0000000000
6 -2.1899500000 -0.5821310000 0.0000000000
1 -2.6368090000 -1.5723410000 0.0000000000
1 -2.5479500000 -0.0444610000 0.8783070000
1 -2.5479500000 -0.0444610000 -0.8783070000
6 0.0000000000 0.5929060000 0.0000000000
1 -0.5095460000 1.5490680000 0.0000000000
8 1.2784680000 0.6431150000 0.0000000000
8 1.8760800000 1.8415190000 0.0000000000
```

Frequencies

|         |         |         |
|---------|---------|---------|
| 92.3566 | 922.504 | 1471.8  |
| 149.98  | 946.752 | 1496.56 |
| 198.584 | 1015.35 | 1510.56 |
| 199.599 | 1032.84 | 1662.94 |
| 369.885 | 1076.4  | 3052.92 |
| 466.157 | 1081.68 | 3109.33 |
| 500.884 | 1277.93 | 3150.17 |
| 561.715 | 1318    | 3175.09 |
| 686.124 | 1426.21 | 3183.58 |
| 912.466 | 1455.52 | 3268.36 |

*van der Waals*

**Pre-reactive Complex (PRC)**

*anti-trans*-MACR-oxide...FA

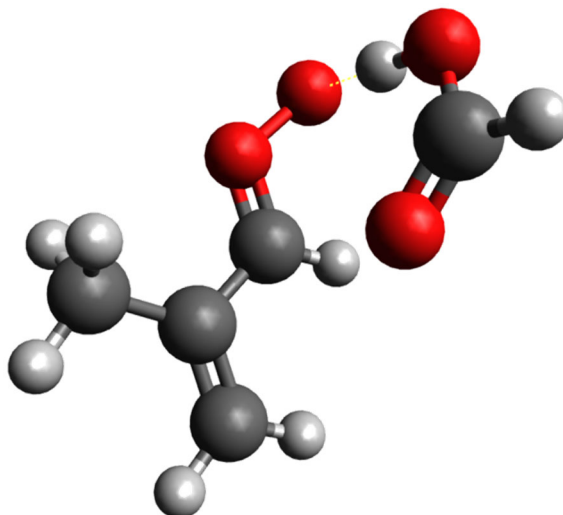

**Coordinates**

```
6 -2.3283790000 0.3217350000 1.2494740000
6 -1.8413310000 -0.1361460000 -0.0905310000
6 -0.6023240000 0.3971540000 -0.5977270000
8 -0.0324740000 1.3279350000 0.0362200000
8 1.1873780000 1.7553580000 -0.5317920000
1 -0.1760140000 0.0974410000 -1.5437290000
6 -2.4672900000 -1.0324900000 -0.8667580000
1 -2.0480190000 -1.3409350000 -1.8132910000
1 -3.4004910000 -1.4831130000 -0.5632560000
1 -3.2789040000 -0.1459070000 1.4901900000
1 -1.6026820000 0.0634440000 2.0196650000
1 -2.4501460000 1.4035210000 1.2718930000
8 0.9516870000 -1.4345460000 0.0403200000
6 2.1241930000 -1.2112890000 0.3102620000
8 2.7374370000 -0.0629640000 0.2717390000
1 2.1009280000 0.7026540000 -0.0512040000
1 2.7938840000 -2.0171600000 0.6295140000
```

**Frequencies**

|         |         |         |         |         |
|---------|---------|---------|---------|---------|
| 47.1659 | 367.617 | 1008.54 | 1458.77 | 3126.99 |
| 53.8529 | 473.284 | 1060.54 | 1492.55 | 3155.6  |
| 77.2663 | 517.889 | 1064.41 | 1504.05 | 3171.25 |
| 158.986 | 568.005 | 1082.39 | 1546.94 | 3228.22 |
| 174.918 | 713.821 | 1171.88 | 1561.42 | 3264.02 |
| 186.865 | 733.261 | 1299.04 | 1681.26 |         |
| 191.169 | 875.077 | 1316.44 | 1692.9  |         |
| 242.142 | 894.257 | 1395.76 | 2303.57 |         |
| 313.528 | 976.894 | 1405.1  | 3056.61 |         |
| 359.111 | 991.822 | 1434.21 | 3064.79 |         |

*syn-cis*-MACR-oxide...FA

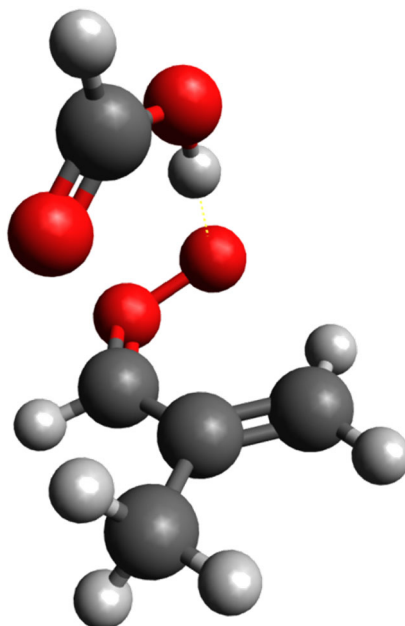

Coordinates

```
6 -2.3456530000 -1.2434990000 -0.0739910000
6 -1.4965890000 -0.0332550000 0.2101900000
6 -0.8141450000 0.4848270000 -0.9476980000
8 0.0909600000 1.3671320000 -1.0484930000
8 0.6753120000 1.8567190000 0.1145160000
1 -1.1113700000 0.1375490000 -1.9300760000
6 -1.4138500000 0.5335000000 1.4276100000
1 -0.7739760000 1.3788690000 1.6049520000
1 -2.0122330000 0.1367340000 2.2362750000
1 -2.8888640000 -1.5456270000 0.8171390000
1 -3.0696760000 -1.0480300000 -0.8653650000
1 -1.7138090000 -2.0710050000 -0.3942990000
8 0.9587040000 -1.4414060000 -0.5843070000
6 1.9275750000 -1.2420220000 0.1247670000
8 2.2922270000 -0.1073440000 0.6752950000
1 1.6596580000 0.6549290000 0.4435320000
1 2.6286120000 -2.0415430000 0.3864950000
```

Frequencies

|         |         |         |         |         |
|---------|---------|---------|---------|---------|
| 41.121  | 362.954 | 1007.6  | 1443.02 | 3118.99 |
| 66.8329 | 416.317 | 1023.44 | 1496.3  | 3150.78 |
| 95.3438 | 531.628 | 1047.83 | 1506.08 | 3170.65 |
| 124.477 | 689.144 | 1086.64 | 1510.95 | 3189.57 |
| 160.698 | 705.634 | 1098.91 | 1561.03 | 3300.94 |
| 167.85  | 720.921 | 1263.45 | 1655.86 |         |
| 247.41  | 867.471 | 1287.65 | 1730.28 |         |
| 275.081 | 914.749 | 1393.02 | 2784.3  |         |
| 291.264 | 950.026 | 1409.2  | 3055.85 |         |
| 320.691 | 1005.23 | 1420.76 | 3061.66 |         |

*syn-trans*-MACR-oxide...FA

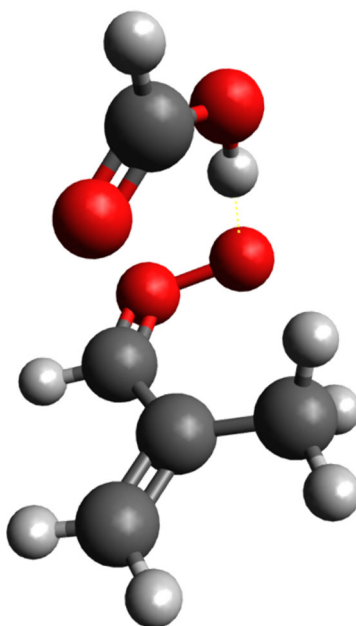

Coordinates

```
6 -1.2546950000 0.0107510000 1.5839420000
6 -1.5966550000 -0.1739430000 0.1360660000
6 -0.9088080000 0.4788580000 -0.9517220000
8 -0.0142910000 1.3703800000 -0.9421250000
8 0.5481020000 1.7376620000 0.2849720000
1 -1.2185010000 0.2536020000 -1.9652380000
6 -2.6042380000 -0.9677300000 -0.2722990000
1 -2.8341670000 -1.1005200000 -1.3195400000
1 -3.2120280000 -1.5064790000 0.4391420000
1 -1.9553140000 -0.5562180000 2.1935850000
1 -0.2450550000 -0.3368970000 1.7816990000
1 -1.2875600000 1.0590500000 1.8623920000
8 1.0143890000 -1.3745900000 -0.5896950000
6 2.0779760000 -1.1237960000 -0.0525660000
8 2.4395060000 0.0160400000 0.4863700000
1 1.6958120000 0.7183100000 0.3944610000
1 2.8736880000 -1.8716250000 0.0367910000
```

Frequencies

|         |         |         |         |         |
|---------|---------|---------|---------|---------|
| 35.5047 | 353.3   | 1007.72 | 1460.11 | 3155.64 |
| 63.8316 | 435.407 | 1048.88 | 1484.89 | 3166.23 |
| 90.2518 | 538.62  | 1070.77 | 1501.5  | 3169.56 |
| 111.118 | 708.873 | 1081.75 | 1526.52 | 3190.08 |
| 168.815 | 721.277 | 1131.32 | 1573.59 | 3261.84 |
| 210.928 | 722.455 | 1270.01 | 1656.19 |         |
| 241.016 | 832.528 | 1356.93 | 1730.6  |         |
| 267.49  | 865.389 | 1388.39 | 2621.39 |         |
| 296.385 | 941.646 | 1406.16 | 3054.42 |         |
| 346.959 | 983.406 | 1428.04 | 3076.19 |         |

## Product Wells

Dioxole...FA

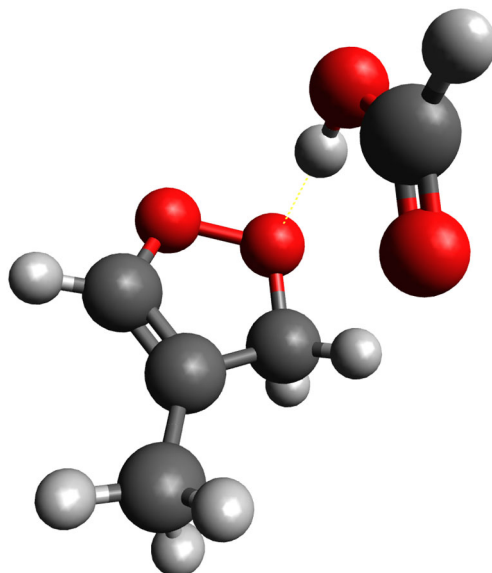

## Coordinates

```
1 -1.8386050000 -0.8199450000 -1.8833160000
6 -1.4431790000 -0.6622050000 -0.8935850000
6 -1.5053100000 0.3844520000 -0.0835300000
6 -0.8211080000 -0.0235450000 1.1892950000
8 -0.7741970000 -1.7537030000 -0.4018890000
8 -0.1388090000 -1.2488630000 0.8409500000
6 -2.1274540000 1.7174420000 -0.2956630000
1 -1.5281710000 -0.2173650000 2.0020570000
1 -0.0502820000 0.6793910000 1.5009950000
1 1.4590010000 -0.8972250000 0.1137940000
8 2.3070030000 -0.6924850000 -0.3447690000
6 2.5209350000 0.6180120000 -0.3072850000
8 1.8090290000 1.4425430000 0.2151170000
1 3.4535560000 0.8630040000 -0.8252140000
1 -2.6021560000 1.7785540000 -1.2722140000
1 -1.3757890000 2.5048620000 -0.2291650000
1 -2.8850670000 1.9238510000 0.4623950000
```

## Frequencies

|         |         |         |         |         |
|---------|---------|---------|---------|---------|
| 26.3409 | 462.168 | 1032.79 | 1432.64 | 3095.95 |
| 34.9321 | 601.819 | 1076.57 | 1437.44 | 3113.12 |
| 76.0208 | 680.078 | 1085.47 | 1492.87 | 3136.42 |
| 135.524 | 768.37  | 1102.39 | 1508.78 | 3259.24 |
| 170.161 | 786.927 | 1202.95 | 1515.05 | 3408.31 |
| 195.658 | 821.269 | 1214.18 | 1738.17 |         |
| 198.079 | 908.665 | 1251.52 | 1780.73 |         |
| 243.679 | 924.151 | 1298.81 | 3013.99 |         |
| 283.95  | 958.149 | 1375.01 | 3043.23 |         |
| 304.641 | 1018.41 | 1386.23 | 3068.46 |         |

### ***Saddle Points***

#### **MACR-oxide *cis/trans* interconversion**

*anti-trans*-MACR-oxide = *anti-cis*-MACR-oxide

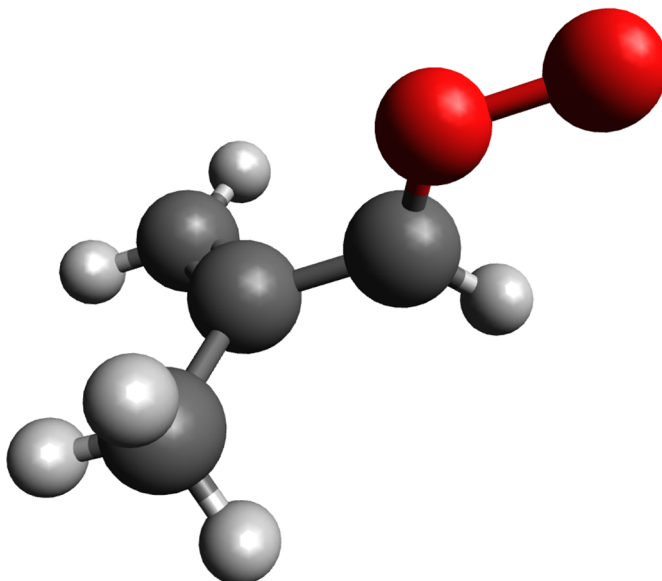

#### Coordinates

```
6 1.6092210000 1.2810260000 -0.1076060000
1 1.0940510000 2.2231800000 0.0060700000
1 2.6508580000 1.3127690000 -0.3942630000
6 0.9909840000 0.1184330000 0.0918290000
6 1.6531040000 -1.2239990000 -0.0538900000
1 2.7014560000 -1.1101110000 -0.3193980000
1 1.5882120000 -1.7941650000 0.8737120000
1 1.1551740000 -1.8100140000 -0.8267380000
6 -0.4253200000 0.1008020000 0.5045430000
1 -0.7784990000 0.1404460000 1.5297190000
8 -1.3150780000 -0.0149520000 -0.3960700000
8 -2.6073200000 -0.0625080000 -0.0387250000
```

#### Frequencies

|          |         |         |
|----------|---------|---------|
| -160.096 | 896.988 | 1471.25 |
| 153.056  | 966.841 | 1490.65 |
| 189.662  | 1000.33 | 1507.24 |
| 219.582  | 1023.9  | 1703.32 |
| 357.686  | 1040.42 | 3048.26 |
| 436.049  | 1088.65 | 3107.1  |
| 490.781  | 1276.95 | 3141.8  |
| 582.86   | 1327.85 | 3162.06 |
| 728.226  | 1419.04 | 3164.31 |
| 871.139  | 1439.36 | 3254.69 |

*syn-trans*-MACR-oxide = *syn-cis*-MACR-oxide

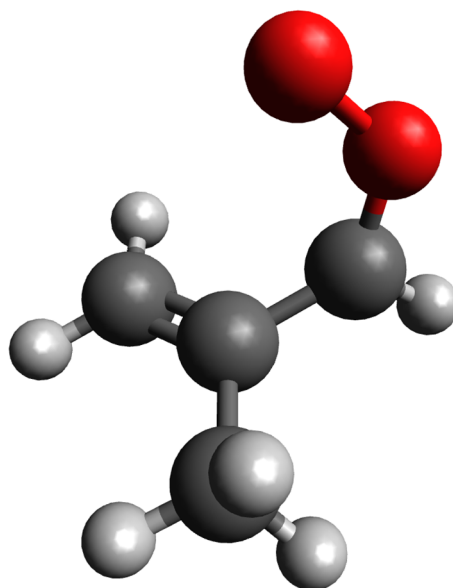

Coordinates

```
6 1.0987730000 1.4130990000 0.1035280000
1 0.4329200000 2.1633620000 0.5022950000
1 2.0079140000 1.7516560000 -0.3724360000
6 0.8093630000 0.1163770000 0.1730550000
6 1.6672970000 -0.9790280000 -0.3962120000
1 2.5773140000 -0.5667570000 -0.8256920000
1 1.9412140000 -1.7081860000 0.3674640000
1 1.1212970000 -1.5096310000 -1.1767190000
6 -0.4163940000 -0.3314480000 0.8469450000
1 -0.4292230000 -0.7904950000 1.8267920000
8 -1.5803740000 -0.2881580000 0.3238710000
8 -1.7453350000 0.2064150000 -0.9095710000
```

Frequencies

|          |         |         |
|----------|---------|---------|
| -103.553 | 910.198 | 1483.01 |
| 180.848  | 952.808 | 1494.57 |
| 201.495  | 980.392 | 1508.86 |
| 236.979  | 992.31  | 1706.1  |
| 386.677  | 1031.25 | 3046.69 |
| 427.726  | 1084.27 | 3106.06 |
| 549.602  | 1278.49 | 3140.73 |
| 659.366  | 1328.18 | 3166.43 |
| 737.322  | 1415.5  | 3195.21 |
| 777.507  | 1451.43 | 3257.29 |



## MACR-oxide + FA 1,4-Addition (TSa)

*anti-trans*-MACR-oxide...FA = *anti-trans*-HPMAF

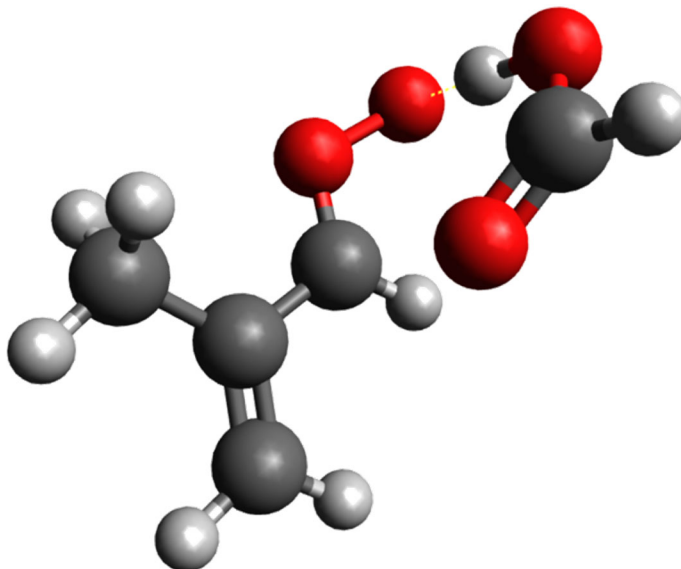

### Coordinates

```
6 -2.2233470000 0.2795650000 1.2867650000
6 -1.7835920000 -0.0860100000 -0.0965160000
6 -0.5104380000 0.4097840000 -0.5699660000
8 0.0612030000 1.3304860000 0.0860120000
8 1.3091040000 1.7228130000 -0.4823810000
1 -0.1186560000 0.1671310000 -1.5461890000
6 -2.4786330000 -0.8549660000 -0.9442700000
1 -2.0899580000 -1.1038230000 -1.9209620000
1 -3.4428110000 -1.2587350000 -0.6733000000
1 -1.5085390000 -0.1004540000 2.0158070000
1 -2.2677640000 1.3603920000 1.4106930000
1 -3.2019180000 -0.1413130000 1.5000220000
8 0.7569100000 -1.4062490000 0.0273700000
6 1.9577830000 -1.2707800000 0.2818160000
8 2.6544010000 -0.1888980000 0.2393930000
1 2.0625260000 0.6912230000 -0.0820650000
1 2.5435410000 -2.1452000000 0.5858600000
```

### Frequencies

|          |         |         |         |         |
|----------|---------|---------|---------|---------|
| -184.019 | 400.053 | 1007.31 | 1436.12 | 3126.69 |
| 55.2501  | 475.057 | 1065.39 | 1460.08 | 3155.14 |
| 66.5782  | 535.047 | 1067.78 | 1492.45 | 3170.79 |
| 125.46   | 566.525 | 1082.57 | 1504.16 | 3230.77 |
| 176.622  | 722.021 | 1226.8  | 1545.88 | 3262.94 |
| 189.435  | 753.328 | 1262.74 | 1655.16 |         |
| 208.23   | 873.128 | 1318.47 | 1687.9  |         |
| 257.123  | 887.941 | 1341.3  | 1780.5  |         |
| 342.958  | 977.06  | 1396.81 | 3053.15 |         |
| 372.216  | 992.604 | 1426.01 | 3064.15 |         |

*syn-cis*-MACR-oxide...FA = *syn-cis*-HPMAF

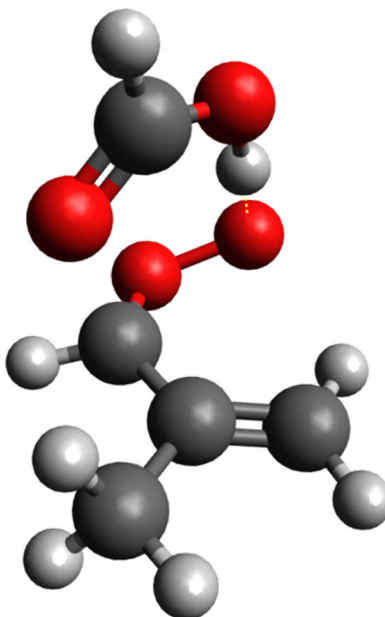

Coordinates

```
6 2.3427290000 1.0926430000 -0.0272690000
6 1.4290370000 -0.0880690000 0.1594210000
6 0.5346920000 -0.3185340000 -0.9637330000
8 -0.3681550000 -1.1989380000 -1.1376740000
8 -0.9171720000 -1.7763670000 0.0404170000
1 0.7897040000 0.1451230000 -1.9090330000
6 1.4915760000 -0.8998040000 1.2253830000
1 0.8091800000 -1.7224450000 1.3439100000
1 2.2517400000 -0.7289690000 1.9749140000
1 3.0238980000 1.1822020000 0.8144270000
1 2.9361940000 0.9955490000 -0.9371740000
1 1.7590400000 2.0077640000 -0.1082190000
8 -0.7032770000 1.4884940000 -0.4883430000
6 -1.6552170000 1.3261690000 0.2851480000
8 -2.0907820000 0.2295490000 0.7950240000
1 -1.5626600000 -0.6979810000 0.4678040000
1 -2.2289080000 2.2024200000 0.6042740000
```

Frequencies

|          |         |         |         |         |
|----------|---------|---------|---------|---------|
| -316.776 | 396.74  | 1017.41 | 1423.95 | 3121.38 |
| 55.7111  | 424.727 | 1044.57 | 1447.42 | 3153.23 |
| 78.9853  | 523.492 | 1061.95 | 1494.64 | 3172.97 |
| 151.582  | 681.495 | 1088.01 | 1512.39 | 3191.33 |
| 159.44   | 701.332 | 1156.58 | 1568.83 | 3297.64 |
| 211.42   | 763.756 | 1230.13 | 1654.15 |         |
| 286.654  | 847.27  | 1286.03 | 1671.5  |         |
| 299.621  | 914.897 | 1341.83 | 1773.22 |         |
| 339.581  | 969.402 | 1387.73 | 3056.22 |         |
| 370.987  | 1000.87 | 1415.17 | 3060.22 |         |

*syn-trans*-MACR-oxide...FA = *syn-trans*-HPMAF

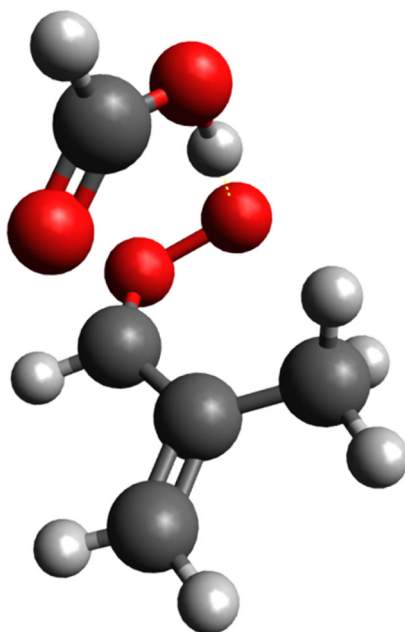

Coordinates

```
6 -1.2567360000 0.4120040000 1.5298760000
6 -1.4930120000 -0.0992950000 0.1406730000
6 -0.6483170000 0.2108440000 -1.0003110000
8 0.1777240000 1.1589350000 -1.1739410000
8 0.6831160000 1.7676300000 0.0112880000
1 -0.8900110000 -0.2648040000 -1.9423430000
6 -2.5416400000 -0.8783650000 -0.1717880000
1 -2.6934820000 -1.2542920000 -1.1730750000
1 -3.2694560000 -1.1565050000 0.5757910000
1 -2.0400010000 0.0400340000 2.1869740000
1 -0.2920690000 0.0777940000 1.9033480000
1 -1.2430980000 1.4969520000 1.5504070000
8 0.8248860000 -1.4512370000 -0.4826920000
6 1.8302430000 -1.1854510000 0.1833470000
8 2.1946380000 -0.0395090000 0.6456960000
1 1.5157300000 0.8069160000 0.3637800000
1 2.5262350000 -1.9910610000 0.4415290000
```

Frequencies

|          |         |         |         |         |
|----------|---------|---------|---------|---------|
| -282.031 | 397.719 | 1006.9  | 1430.87 | 3148.11 |
| 57.8743  | 441.972 | 1062.4  | 1463.06 | 3163.88 |
| 71.8933  | 525.359 | 1067.27 | 1486.79 | 3169.81 |
| 132.463  | 693.214 | 1084.79 | 1504.62 | 3200.16 |
| 204.744  | 728.265 | 1137.08 | 1574.93 | 3260.92 |
| 231.886  | 760.324 | 1256.82 | 1658.8  |         |
| 272.249  | 830.985 | 1335.37 | 1667.41 |         |
| 285.667  | 865.198 | 1350.16 | 1764.96 |         |
| 343.809  | 954.998 | 1380.62 | 3053.22 |         |
| 366.064  | 983.565 | 1414.6  | 3074.32 |         |

### MACR-oxide, Dioxole Formation (TSd)

*syn-cis*-MACR-oxide = Dioxole

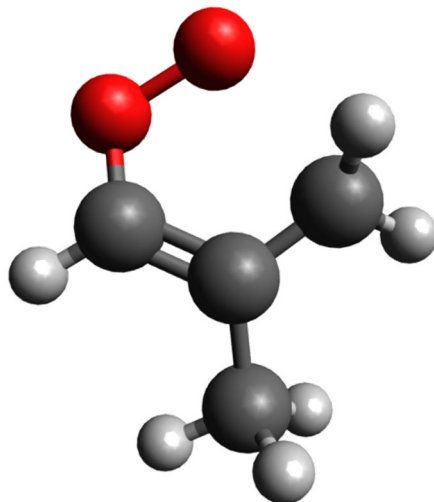

#### Coordinates

```
1 -0.0808780000 -2.0361170000 -0.1935480000
6 0.1811600000 -0.9883890000 -0.1861310000
6 -0.7163440000 0.0553410000 -0.1565180000
6 -0.2291240000 1.3648690000 -0.0499970000
8 1.4420110000 -0.7910140000 0.1332480000
8 1.7778130000 0.5408270000 0.0716440000
6 -2.1729720000 -0.2477100000 0.0987930000
1 -0.8175570000 2.0477150000 0.5633990000
1 0.4177060000 1.8311810000 -0.7630170000
1 -2.7970010000 0.0564450000 -0.7399510000
1 -2.5153510000 0.3042150000 0.9755330000
1 -2.3418350000 -1.3066130000 0.2815660000
```

#### Frequencies

|          |         |         |
|----------|---------|---------|
| -467.325 | 931.041 | 1491.09 |
| 138.397  | 965.047 | 1509.17 |
| 173.471  | 1008.11 | 1543.1  |
| 332.282  | 1018.48 | 1561.59 |
| 384.304  | 1057.26 | 3049.66 |
| 475.879  | 1088.35 | 3086.1  |
| 541.913  | 1245.89 | 3109.55 |
| 714.295  | 1273.84 | 3133.83 |
| 769.694  | 1418.37 | 3223.7  |
| 871.362  | 1424.94 | 3311.78 |

## MACR-oxide + FA, Dioxole Formation from Spectator Catalysis (TSdc)

*syn-cis*-MACR-oxide...FA = Dioxole...FA

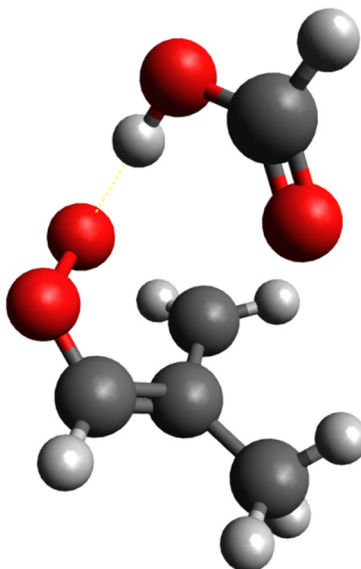

### Coordinates

```
1 1.6718880000 -0.6239290000 -1.8866430000
6 1.2988650000 -0.7224080000 -0.8774900000
6 1.6366920000 0.0992550000 0.1717000000
6 1.0130950000 -0.1086980000 1.4035090000
8 0.2322250000 -1.4863970000 -0.8280970000
8 -0.2444570000 -1.6191160000 0.4794390000
6 2.3110630000 1.4134040000 -0.1401600000
1 0.7432030000 0.7799070000 1.9704850000
1 1.0815340000 -1.0202200000 1.9613780000
1 -1.6967630000 -0.7856250000 0.2895250000
8 -2.5440420000 -0.2722920000 0.1559050000
6 -2.2772160000 0.9844100000 -0.1592090000
8 -1.1804770000 1.4835970000 -0.2765680000
1 -3.2078970000 1.5442380000 -0.3070450000
1 2.6215860000 1.4617350000 -1.1813020000
1 3.1851450000 1.5793170000 0.4852190000
1 1.6003220000 2.2224580000 0.0328610000
```

### Frequencies

|          |         |         |         |         |
|----------|---------|---------|---------|---------|
| -449.862 | 381.651 | 1021.09 | 1421.02 | 3124.1  |
| 31.7145  | 480.765 | 1045.17 | 1447.29 | 3131.92 |
| 59.5814  | 525.028 | 1060.63 | 1494.07 | 3140.85 |
| 66.6323  | 689.356 | 1095.49 | 1509.84 | 3223.1  |
| 120.85   | 720.148 | 1100.29 | 1551.05 | 3304.82 |
| 134.404  | 773.021 | 1227.82 | 1565.27 |         |
| 168.571  | 887.635 | 1256.17 | 1767.71 |         |
| 216.376  | 925.938 | 1278.47 | 3043.29 |         |
| 251.806  | 939.677 | 1398.25 | 3055.89 |         |
| 325.496  | 1010.8  | 1418.64 | 3115.17 |         |

## Products

### HPMAF

#### *anti-trans*-HPMAF

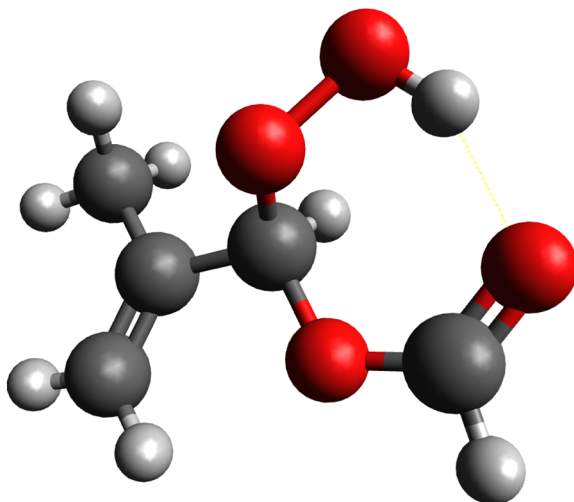

#### Coordinates

```
6 0.1664670000 0.0342290000 0.2169030000
6 1.6307850000 -0.2823040000 0.0733260000
6 2.0744730000 -1.4667780000 -0.3366110000
1 1.4031950000 -2.2722910000 -0.5835420000
1 3.1353120000 -1.6476330000 -0.4307370000
6 2.5264030000 0.8683930000 0.4251920000
1 2.3183830000 1.7256570000 -0.2131110000
1 2.3626490000 1.1889150000 1.4557650000
1 3.5711860000 0.5905010000 0.3144790000
1 -0.0761020000 0.4094320000 1.2103960000
8 -0.5883420000 -1.1931630000 0.0018380000
6 -1.9143490000 -1.1640380000 0.0967810000
8 -2.6151310000 -0.1987960000 0.2927400000
1 -2.3072990000 -2.1754780000 -0.0320850000
8 -0.1615100000 1.0110930000 -0.7246890000
8 -1.0652810000 1.9821950000 -0.1370800000
1 -1.8678760000 1.4332690000 -0.0371870000
```

#### Frequencies

|         |         |         |         |         |
|---------|---------|---------|---------|---------|
| 47.4744 | 495.462 | 1013.34 | 1422.75 | 3111.97 |
| 71.9752 | 521.407 | 1041.26 | 1458.29 | 3148.5  |
| 140.437 | 579.03  | 1052.69 | 1489.01 | 3178.29 |
| 168.995 | 611.558 | 1074.75 | 1491.48 | 3274.7  |
| 240.478 | 732.501 | 1088.53 | 1509.89 | 3568.61 |
| 252.614 | 790.853 | 1228.63 | 1722.39 |         |
| 256.082 | 900.805 | 1274.55 | 1760.06 |         |
| 301.737 | 924.164 | 1356.07 | 3049.79 |         |
| 371.412 | 952.033 | 1390.23 | 3091.85 |         |
| 397.031 | 963.357 | 1417.17 | 3093.45 |         |

*anti-trans*-HPMAF Geometry 2

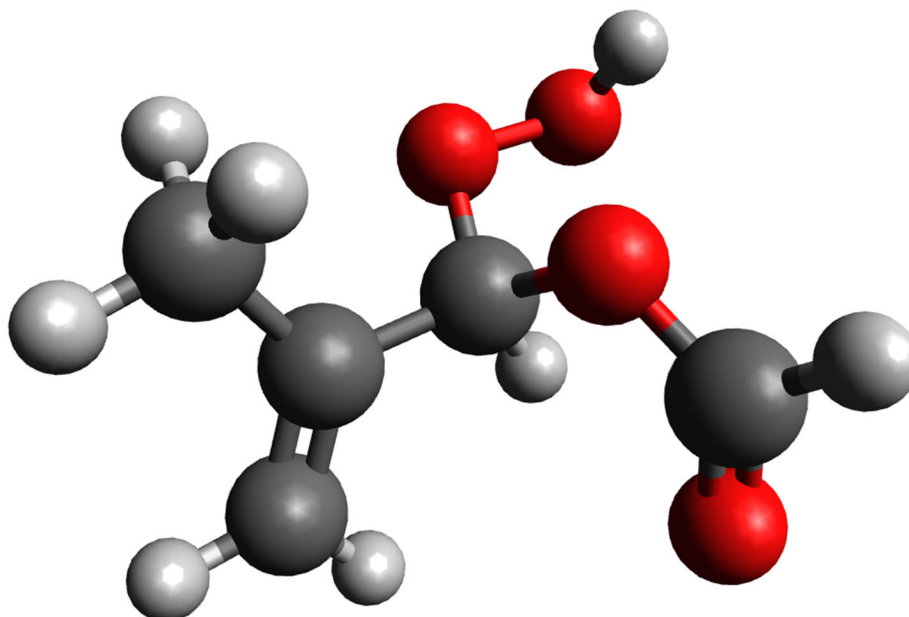

Coordinates

```
6 0.0108200000 0.2853950000 -0.2937400000
6 -1.3658580000 -0.2956980000 -0.1613990000
6 -1.7631330000 -1.1988200000 -1.0542410000
1 -1.1219960000 -1.5063910000 -1.8670430000
1 -2.7366140000 -1.6624130000 -0.9830390000
6 -2.1898910000 0.1630340000 1.0039460000
1 -3.1327220000 -0.3768420000 1.0428010000
1 -1.6555090000 0.0018580000 1.9401390000
1 -2.4000000000 1.2296120000 0.9334460000
1 0.5089900000 -0.0088630000 -1.2113290000
8 0.8401600000 -0.1423180000 0.8280440000
6 1.6192730000 -1.2194670000 0.6206530000
8 1.6739310000 -1.8782130000 -0.3819450000
1 2.2062430000 -1.4084980000 1.5252360000
8 -0.0974270000 1.6697540000 -0.1967220000
8 1.1916800000 2.2292560000 -0.5490900000
1 1.5975950000 2.2970310000 0.3261740000
```

Frequencies

|         |         |         |         |         |
|---------|---------|---------|---------|---------|
| 47.1873 | 378.776 | 1005.02 | 1410.29 | 3143.98 |
| 55.7001 | 536.028 | 1044.45 | 1423.23 | 3149.56 |
| 128.283 | 554.706 | 1057.17 | 1469.93 | 3165.69 |
| 163.465 | 574.428 | 1084.38 | 1491.92 | 3254.38 |
| 178.412 | 726.066 | 1130.87 | 1511.31 | 3760.68 |
| 192.386 | 784.465 | 1191.62 | 1720.37 |         |
| 249.421 | 871.451 | 1321.67 | 1785.13 |         |
| 277.047 | 925.589 | 1358.23 | 3057.29 |         |
| 313.973 | 933.845 | 1376.27 | 3064.67 |         |
| 365.066 | 960.371 | 1387.47 | 3116.89 |         |

*syn-cis*-HPMAF

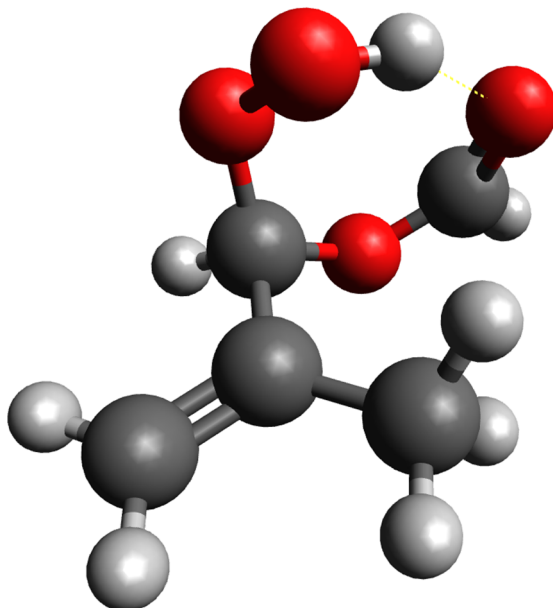

Coordinates

```
6 -0.3061810000 0.2905030000 -0.8449930000
6 -1.3856710000 -0.3352100000 0.0033650000
6 -2.6466560000 -0.0661400000 -0.3276230000
1 -2.8892400000 0.5647570000 -1.1709070000
1 -3.4715080000 -0.4563370000 0.2502610000
6 -1.0134930000 -1.2290670000 1.1470980000
1 -1.9104470000 -1.5930800000 1.6420480000
1 -0.4472100000 -2.0928750000 0.7982230000
1 -0.4009360000 -0.7026320000 1.8746130000
1 -0.6709130000 0.4848760000 -1.8496180000
8 0.7588940000 -0.7018330000 -1.1178770000
6 1.8505790000 -0.8429650000 -0.3774010000
8 2.1752570000 -0.2352660000 0.6177730000
1 2.4671660000 -1.6343050000 -0.8121090000
8 0.1771120000 1.5210500000 -0.4366290000
8 0.2897010000 1.5952280000 1.0047850000
1 1.1239080000 1.0934500000 1.1203950000
```

Frequencies

|         |         |         |         |         |
|---------|---------|---------|---------|---------|
| 56.0857 | 483.693 | 995.395 | 1422.63 | 3132.62 |
| 74.6955 | 536.176 | 1047.23 | 1465.7  | 3152.12 |
| 169.678 | 639.493 | 1057.01 | 1494    | 3163.76 |
| 193.403 | 683.067 | 1082.5  | 1501.94 | 3250.1  |
| 224.893 | 747.521 | 1099.51 | 1512.56 | 3511.29 |
| 238.561 | 758.67  | 1210.77 | 1710.37 |         |
| 286.937 | 854.113 | 1322.18 | 1750.76 |         |
| 305.259 | 902.532 | 1356.71 | 3061.3  |         |
| 365.6   | 915.407 | 1398.07 | 3083.16 |         |
| 401.387 | 955.636 | 1418.66 | 3126.16 |         |



*syn-cis*-HPMAF Geometry 2

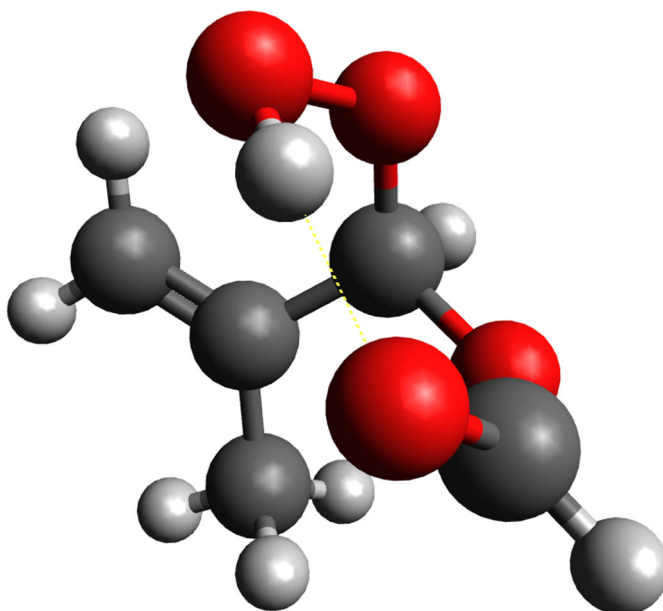

Coordinates

```
6 0.1815980000 0.1356200000 0.9073460000
6 1.3295820000 -0.1894060000 -0.0190590000
6 2.1002740000 0.7783000000 -0.5068930000
1 1.8724670000 1.8194320000 -0.3535210000
1 2.9756600000 0.5319540000 -1.0904210000
6 1.6221020000 -1.6471510000 -0.2294300000
1 0.8554190000 -2.1237660000 -0.8404950000
1 2.5769800000 -1.7663290000 -0.7347970000
1 1.6590260000 -2.1901860000 0.7155620000
1 0.5013540000 0.0399350000 1.9442360000
8 -0.8422840000 -0.9429950000 0.8663420000
6 -1.6717560000 -1.0751760000 -0.1573900000
8 -1.7981710000 -0.3377950000 -1.1094390000
1 -2.2686650000 -1.9815220000 -0.0253140000
8 -0.3737170000 1.3993620000 0.8720370000
8 -0.5394200000 1.9324940000 -0.4677630000
1 -1.1142950000 1.2488280000 -0.8721060000
```

Frequencies

|         |         |         |         |         |
|---------|---------|---------|---------|---------|
| 45.2788 | 468.519 | 995.826 | 1426.86 | 3104.64 |
| 56.5167 | 532.95  | 1033.08 | 1459.73 | 3142.96 |
| 195.881 | 616.337 | 1054.75 | 1496.25 | 3176.86 |
| 206.538 | 654.725 | 1086.39 | 1506.13 | 3279.86 |
| 227.721 | 686.94  | 1108.34 | 1527.82 | 3499.13 |
| 256.518 | 773.242 | 1207.38 | 1714.56 |         |
| 286.529 | 844.741 | 1290.57 | 1751.48 |         |
| 308.202 | 900.471 | 1360.66 | 3050.64 |         |
| 387.79  | 941.607 | 1407.44 | 3085.3  |         |
| 394.853 | 964.925 | 1416.21 | 3098.06 |         |

*syn-trans*-HPMAF

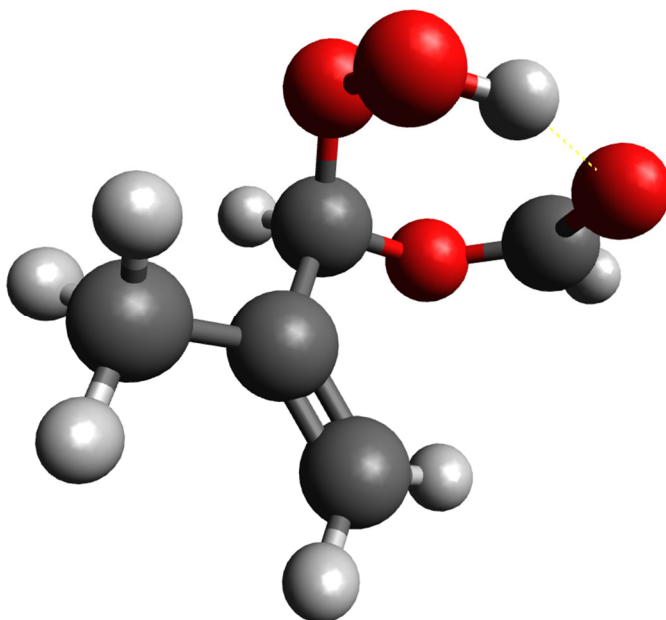

Coordinates

```
6 0.2002100000 0.0367680000 0.8776120000
6 1.2279820000 -0.5897170000 -0.0271250000
6 1.0149280000 -1.7355310000 -0.6656090000
1 0.0799480000 -2.2681630000 -0.6000530000
1 1.7910760000 -2.1724770000 -1.2763630000
6 2.5307290000 0.1533330000 -0.0697180000
1 2.3942660000 1.1349550000 -0.5173690000
1 2.9249690000 0.3035520000 0.9369810000
1 3.2662440000 -0.4020030000 -0.6459570000
1 0.5286210000 -0.0091010000 1.9160360000
8 -1.0384870000 -0.7480820000 0.9397480000
6 -2.0220010000 -0.6227810000 0.0555900000
8 -2.0971780000 0.1307520000 -0.8870730000
1 -2.8141650000 -1.3313190000 0.3114730000
8 -0.0145240000 1.3925840000 0.6712400000
8 0.0183530000 1.7218420000 -0.7393540000
1 -0.8273580000 1.3153530000 -1.0257370000
```

Frequencies

|         |         |         |         |         |
|---------|---------|---------|---------|---------|
| 70.5295 | 480.974 | 993.335 | 1422.86 | 3120.91 |
| 83.915  | 514.586 | 1041.54 | 1458.38 | 3153.02 |
| 173.439 | 645.536 | 1051.63 | 1493.07 | 3177.99 |
| 194.137 | 675.637 | 1081    | 1509.1  | 3265.58 |
| 231.603 | 721.742 | 1094.09 | 1513.09 | 3493.24 |
| 239.065 | 777.979 | 1207.83 | 1721.93 |         |
| 295.139 | 868.517 | 1282.23 | 1758.92 |         |
| 302.108 | 914.457 | 1365.99 | 3052.19 |         |
| 392.21  | 941.601 | 1402.24 | 3085.61 |         |
| 422.015 | 947.353 | 1420.96 | 3091.25 |         |

*syn-trans*-HPMAF Geometry 2

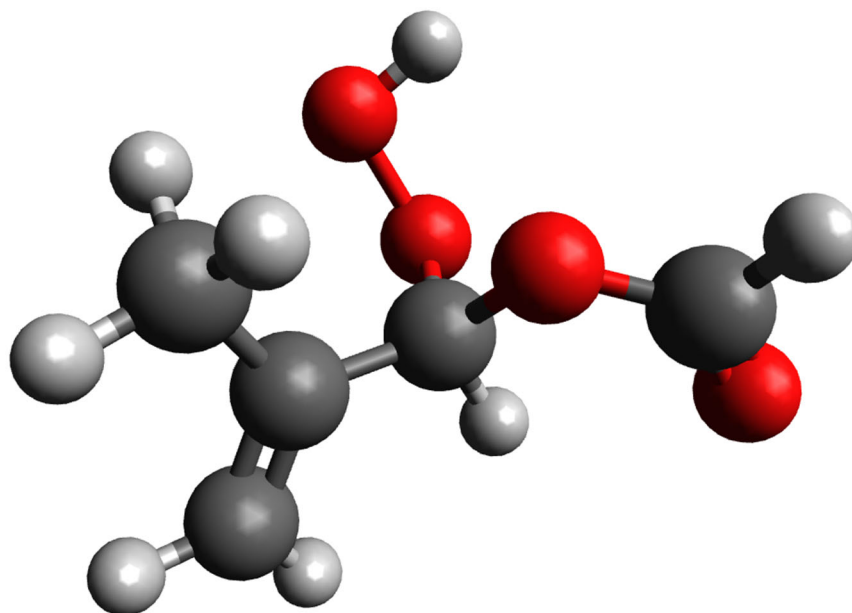

Coordinates

```
6 0.0595850000 -0.0775020000 -0.4114510000
6 -1.2788090000 -0.6587840000 -0.0412520000
6 -1.7920840000 -1.5754310000 -0.8605000000
1 -1.2733040000 -1.8910230000 -1.7544490000
1 -2.7523570000 -2.0287160000 -0.6612400000
6 -1.9629280000 -0.2137030000 1.2172780000
1 -2.8487800000 -0.8184190000 1.3972470000
1 -1.2959310000 -0.3095210000 2.0725520000
1 -2.2542270000 0.8316980000 1.1496910000
1 0.5616350000 -0.6869750000 -1.1581840000
8 0.8792370000 -0.0197170000 0.7763740000
6 2.1734420000 -0.3847560000 0.6390920000
8 2.7019380000 -0.7791450000 -0.3620080000
1 2.6706530000 -0.2713400000 1.6069690000
8 0.0467210000 1.1836430000 -1.0249010000
8 -0.6417930000 2.1306010000 -0.1669370000
1 0.1082410000 2.5123080000 0.3081920000
```

Frequencies

|         |         |         |         |         |
|---------|---------|---------|---------|---------|
| 27.8594 | 405.562 | 993.625 | 1409.44 | 3136.39 |
| 38.2613 | 523.069 | 1045.63 | 1420.24 | 3147.17 |
| 129.71  | 549.124 | 1061.95 | 1468.86 | 3162.16 |
| 164.735 | 678.897 | 1077.65 | 1490.12 | 3247.97 |
| 187.775 | 734.916 | 1087.26 | 1516.57 | 3769.48 |
| 211.871 | 778.243 | 1166.43 | 1709.79 |         |
| 229.695 | 866.936 | 1323.03 | 1794.28 |         |
| 276.571 | 903.7   | 1356.51 | 3066.49 |         |
| 286.844 | 953.35  | 1381.27 | 3074.83 |         |
| 349.045 | 956.663 | 1387.45 | 3133.21 |         |

*anti-cis*-HPMAF

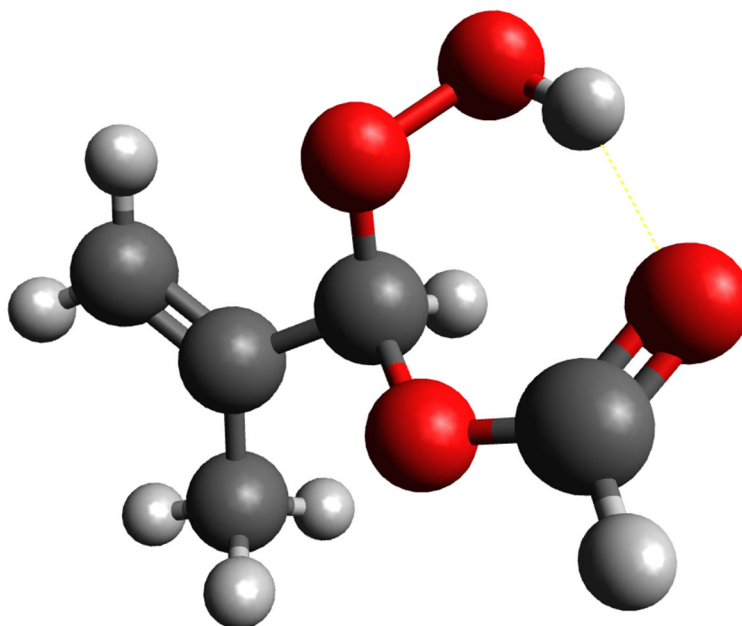

Coordinates

```
6 2.2657480000 1.2920740000 -0.4699020000
6 1.6554170000 -0.0098140000 -0.0414730000
6 0.1652370000 -0.1223080000 -0.2199360000
8 -0.3392730000 -1.2589570000 0.3891110000
8 -1.3561420000 -1.8539830000 -0.4547040000
1 -0.1274800000 -0.1112780000 -1.2689790000
6 2.3604030000 -1.0398110000 0.4178040000
1 1.8857150000 -1.9638640000 0.7043790000
1 3.4342340000 -0.9678460000 0.5106100000
1 3.3505280000 1.2331070000 -0.4348900000
1 1.9688950000 1.5466690000 -1.4891640000
1 1.9384020000 2.1085960000 0.1712000000
8 -0.3896120000 1.0988770000 0.3975790000
6 -1.6996810000 1.3081730000 0.3218900000
8 -2.5313160000 0.5757400000 -0.1629360000
1 -2.0609220000 -1.1810340000 -0.3723380000
1 -1.9413750000 2.2723590000 0.7764810000
```

Frequencies

|         |         |         |         |         |
|---------|---------|---------|---------|---------|
| 56.4249 | 479.414 | 1015.75 | 1422.62 | 3111.73 |
| 80.3773 | 516.927 | 1030.02 | 1454.82 | 3146.16 |
| 142.372 | 580.931 | 1054.73 | 1493.28 | 3176.61 |
| 183.229 | 616.943 | 1089.22 | 1494.92 | 3274.25 |
| 233.955 | 726.582 | 1115.66 | 1508.44 | 3561.9  |
| 247.141 | 792.21  | 1219.6  | 1720.16 |         |
| 263.309 | 870.387 | 1282.66 | 1754.78 |         |
| 300.163 | 918.764 | 1351.74 | 3049.27 |         |
| 372.568 | 957.135 | 1388.46 | 3088.07 |         |
| 432.188 | 972.282 | 1414.04 | 3094.59 |         |

*anti-cis*-HPMAF Geometry 2

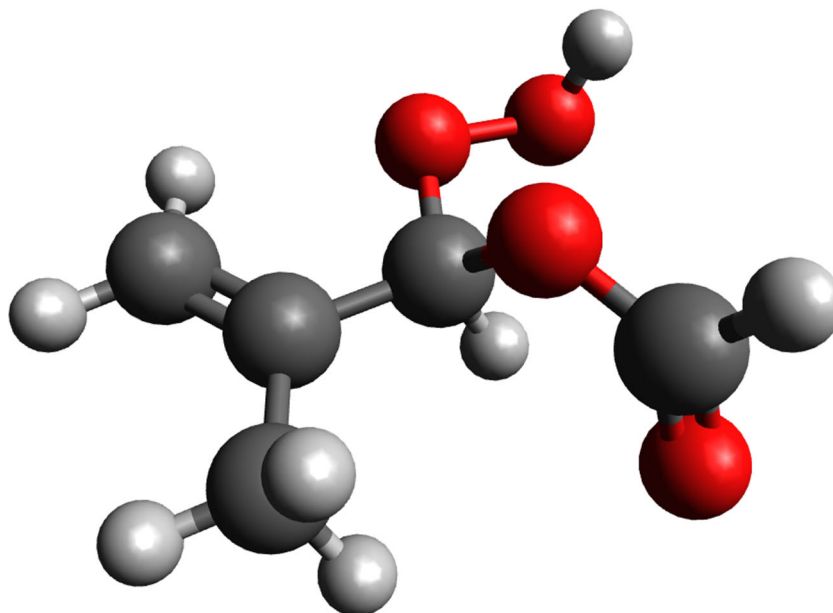

Coordinates

```
6 -0.0997050000 0.3275920000 -0.1685400000
6 -1.4478010000 -0.3320120000 -0.0586100000
6 -2.5690920000 0.3812800000 0.0050070000
1 -2.5593590000 1.4590150000 0.0084290000
1 -3.5278280000 -0.1147380000 0.0507170000
6 -1.4189710000 -1.8321030000 -0.0766610000
1 -0.8401990000 -2.2039320000 -0.9226940000
1 -0.9532040000 -2.2239590000 0.8274650000
1 -2.4283510000 -2.2295630000 -0.1419090000
1 0.3582970000 0.1638460000 -1.1414290000
8 0.8005980000 -0.2290880000 0.8319720000
6 1.7965220000 -1.0227230000 0.3972610000
8 1.9689620000 -1.4093300000 -0.7267370000
1 2.4354290000 -1.2780930000 1.2486330000
8 -0.2202060000 1.6849430000 0.0983540000
8 1.0111450000 2.3151720000 -0.3330730000
1 1.4655060000 2.4016420000 0.5159220000
```

Frequencies

|         |         |         |         |         |
|---------|---------|---------|---------|---------|
| 43.8809 | 392.11  | 1016.27 | 1409.78 | 3116.08 |
| 49.9871 | 482.196 | 1029.36 | 1423.67 | 3145.86 |
| 121.349 | 551.834 | 1046.92 | 1459.75 | 3174.4  |
| 177.094 | 576.707 | 1086.39 | 1493.51 | 3270.36 |
| 193.265 | 713.442 | 1133.87 | 1511.27 | 3766.61 |
| 202.562 | 777.91  | 1190    | 1718.18 |         |
| 252.107 | 904.526 | 1286.53 | 1784.78 |         |
| 274.497 | 927.74  | 1381.32 | 3053.62 |         |
| 341.887 | 951.089 | 1385.27 | 3066.62 |         |
| 370.013 | 962.224 | 1396.09 | 3110.7  |         |

## References

1. Caravan, R. L.; Vansco, M. F.; Au, K.; Khan, M. A. H.; Li, Y.-L.; Winiberg, F. A. F.; Zuraski, K.; Lin, Y.-H.; Chao, W.; Trongsirawat, N.; Walsh, P. J.; Osborn, D. L.; Percival, C. J.; Lin, J. J.-M.; Shallcross, D. E.; Sheps, L.; Klippenstein, S. J.; Taatjes, C. A.; Lester, M. I., Direct kinetic measurements and theoretical predictions of an isoprene-derived Criegee intermediate. *Proc. Natl. Acad. Sci.* **2020**, 117, 9733-9740.
2. Vereecken, L.; Novelli, A.; Taraborrelli, D., Unimolecular decay strongly limits the atmospheric impact of Criegee intermediates. *Phys. Chem. Chem. Phys.* **2017**, 19, 31599-31612.
3. Barber, V. P.; Pandit, S.; Green, A. M.; Trongsirawat, N.; Walsh, P. J.; Klippenstein, S. J.; Lester, M. I., Four-Carbon Criegee Intermediate from Isoprene Ozonolysis: Methyl Vinyl Ketone Oxide Synthesis, Infrared Spectrum, and OH Production. *J. Am. Chem. Soc.* **2018**, 140, 10866-10880.
4. Vansco, M. F.; Caravan, R. L.; Pandit, S.; Zuraski, K.; Winiberg, F. A. F.; Au, K.; Bhagde, T.; Trongsirawat, N.; Walsh, P. J.; Osborn, D. L.; Percival, C. J.; Klippenstein, S. J.; Taatjes, C. A.; Lester, M. I., Formic acid catalyzed isomerization and adduct formation of an isoprene-derived Criegee intermediate: experiment and theory. *Phys. Chem. Chem. Phys.* **2020**, 22, 26796.
